# Supplementary material for: Effects of tamoxifen and exemestane on cognitive function in postmenopausal patients with breast cancer
Source: PubMed Central journal article supplement — JNCI Cancer Spectr. 2023 Apr 2;7(2):pkad022. doi: 10.1093/jncics/pkad022 (PMC10121337; doi:10.1093/jncics/pkad022), 2023-04-02

**Supplementary Table 1. Drop-out patterns for the Sequential, Exemestane and control group.**

| Drop-out pattern           | Sequential group | Exemestane group | Control group |
|----------------------------|------------------|------------------|---------------|
|                            | N (%)            | N (%)            | N (%)         |
| Completed Baseline only    | 11 (12)          | 14 (12)          | 4 (3)         |
| Completed Baseline+FU1     | 45 (50)          | 42 (37)          | 57 (46)       |
| Completed Baseline+FU1+FU2 | 35 (39)          | 57 (50)          | 62 (50)       |

Abbreviations: FU, follow-up.

Supplementary Table 2. Results of the intention-to-treat analyses of the Sequential, the Exemestane and the control group.

| Cognitive domain/test                     | P-value overall group-by-time interaction | Group      | Adjusted mean Z-scores |                |       |                |       |                | Sequential group and exemestane vs control |                |       |                 |                                     |                | AIC  | BIC   |         |                 |
|-------------------------------------------|-------------------------------------------|------------|------------------------|----------------|-------|----------------|-------|----------------|--------------------------------------------|----------------|-------|-----------------|-------------------------------------|----------------|------|-------|---------|-----------------|
|                                           |                                           |            | T0                     |                | T1    |                | T2    |                | T0-T1                                      |                | T0-T2 |                 |                                     |                |      |       |         |                 |
|                                           |                                           |            | Mean                   | 95% CI         | Mean  | 95% CI         | Mean  | 95% CI         | Mean difference in change over time        | 95% CI         | p     | ES <sup>a</sup> | Mean difference in change over time | 95% CI         |      |       | p       | ES <sup>a</sup> |
| Verbal memory <sup>b</sup>                | .02                                       | Sequential | 0.06                   | -0.11 to 0.22  | 0.03  | -0.14 to 0.20  | -0.32 | -0.55 to -0.09 | -0.21                                      | -0.38 to -0.05 | .01   | -0.26           | -0.44                               | -0.72 to -0.15 | .003 | -0.34 | 1375.19 | 1498.98         |
|                                           |                                           | Exemestane | -0.09                  | -0.24 to 0.05  | 0.03  | -0.12 to 0.18  | -0.16 | -0.35 to 0.02  | -0.06                                      | -0.21 to 0.09  | .42   | -0.08           | -0.13                               | -0.39 to 0.12  | .31  | -0.12 |         |                 |
|                                           |                                           | Control    | -0.09                  | -0.23 to 0.06  | 0.10  | -0.04 to 0.24  | -0.02 | -0.22 to 0.18  |                                            |                |       |                 |                                     |                |      |       |         |                 |
| RAVLT IR <sup>c</sup>                     | .04                                       | Sequential | 0.04                   | -0.15 to 0.24  | 0.03  | -0.18 to 0.24  | -0.27 | -0.54 to -0.01 | -0.13                                      | -0.37 to 0.11  | .28   | -0.11           | -0.52                               | -0.87 to -0.18 | .003 | -0.36 | 1832.08 | 1979.97         |
|                                           |                                           | Exemestane | -0.18                  | -0.36 to 0.00  | -0.02 | -0.20 to 0.16  | -0.25 | -0.47 to -0.03 | 0.04                                       | -0.18 to 0.26  | .73   | 0.03            | -0.28                               | -0.60 to 0.04  | .09  | -0.21 |         |                 |
|                                           |                                           | Control    | -0.09                  | -0.25 to 0.08  | 0.04  | -0.13 to 0.21  | 0.12  | -0.12 to 0.36  |                                            |                |       |                 |                                     |                |      |       |         |                 |
| RAVLT DR <sup>c</sup>                     | .12                                       | Sequential | 0.09                   | -0.11 to 0.28  | 0.03  | -0.17 to 0.24  | -0.08 | -0.33 to 0.18  | -0.28                                      | -0.50 to -0.06 | .01   | -0.25           | -0.32                               | -0.66 to 0.01  | .06  | -0.22 | 1767.07 | 1914.96         |
|                                           |                                           | Exemestane | -0.06                  | -0.23 to 0.12  | 0.06  | -0.12 to 0.24  | -0.01 | -0.23 to 0.20  | -0.11                                      | -0.31 to 0.09  | .27   | -0.11           | -0.12                               | -0.43 to 0.20  | .47  | -0.09 |         |                 |
|                                           |                                           | Control    | -0.08                  | -0.25 to 0.09  | 0.15  | -0.02 to 0.32  | 0.08  | -0.15 to 0.31  |                                            |                |       |                 |                                     |                |      |       |         |                 |
| VAT <sup>d</sup>                          | .45                                       | Sequential | 0.07                   | -0.17 to 0.31  | 0.05  | -0.21 to 0.31  | -0.39 | -0.76 to -0.02 | -0.22                                      | -0.51 to 0.06  | .12   | -0.16           | -0.36                               | -0.85 to 0.12  | .14  | -0.15 | 2061.17 | 2184.96         |
|                                           |                                           | Exemestane | -0.12                  | -0.33 to 0.10  | 0.05  | -0.17 to 0.27  | -0.25 | -0.54 to 0.04  | -0.04                                      | -0.30 to 0.22  | .74   | -0.03           | -0.04                               | -0.47 to 0.39  | .85  | -0.02 |         |                 |
|                                           |                                           | Control    | -0.04                  | -0.24 to 0.17  | 0.17  | -0.04 to 0.39  | -0.13 | -0.43 to 0.18  |                                            |                |       |                 |                                     |                |      |       |         |                 |
| Visual memory <sup>b</sup>                | .12                                       | Sequential | -0.38                  | -0.58 to -0.19 | -0.36 | -0.57 to -0.15 | -0.37 | -0.63 to -0.11 | 0.03                                       | -0.18 to 0.23  | .80   | 0.03            | -0.19                               | -0.51 to 0.13  | .24  | -0.14 | 1724.22 | 1848.96         |
|                                           |                                           | Exemestane | -0.33                  | -0.51 to -0.15 | -0.20 | -0.38 to -0.02 | -0.35 | -0.56 to -0.13 | 0.13                                       | -0.06 to 0.32  | .17   | 0.14            | -0.22                               | -0.51 to 0.07  | .14  | -0.18 |         |                 |
|                                           |                                           | Control    | -0.08                  | -0.25 to 0.09  | -0.09 | -0.26 to 0.09  | 0.12  | -0.11 to 0.35  |                                            |                |       |                 |                                     |                |      |       |         |                 |
| WMS Visual Memory IR <sup>b</sup>         | .73                                       | Sequential | -0.35                  | -0.55 to -0.14 | -0.40 | -0.62 to -0.18 | -0.38 | -0.66 to -0.10 | -0.01                                      | -0.24 to 0.22  | .94   | -0.01           | -0.16                               | -0.51 to 0.20  | .38  | -0.10 | 1860.15 | 1985.00         |
|                                           |                                           | Exemestane | -0.31                  | -0.49 to -0.12 | -0.28 | -0.47 to -0.09 | -0.32 | -0.55 to -0.09 | 0.06                                       | -0.15 to 0.28  | .57   | 0.06            | -0.14                               | -0.46 to 0.19  | .40  | -0.10 |         |                 |
|                                           |                                           | Control    | -0.10                  | -0.28 to 0.08  | -0.14 | -0.32 to 0.04  | 0.03  | -0.22 to 0.27  |                                            |                |       |                 |                                     |                |      |       |         |                 |
| WMS Visual Memory DR <sup>b</sup>         | .046                                      | Sequential | -0.46                  | -0.67 to -0.25 | -0.35 | -0.58 to -0.13 | -0.36 | -0.65 to -0.08 | 0.08                                       | -0.17 to 0.32  | .53   | 0.06            | -0.19                               | -0.55 to 0.18  | .31  | -0.12 | 1902.66 | 2027.40         |
|                                           |                                           | Exemestane | -0.36                  | -0.55 to -0.17 | -0.12 | -0.32 to 0.07  | -0.35 | -0.59 to -0.12 | 0.21                                       | -0.02 to 0.43  | .07   | 0.18            | -0.27                               | -0.60 to 0.06  | .10  | -0.20 |         |                 |
|                                           |                                           | Control    | -0.07                  | -0.25 to 0.11  | -0.04 | -0.22 to 0.15  | 0.21  | -0.04 to 0.47  |                                            |                |       |                 |                                     |                |      |       |         |                 |
| Information processing speed <sup>b</sup> | .04                                       | Sequential | -0.24                  | -0.39 to -0.09 | -0.28 | -0.44 to -0.12 | -0.44 | -0.64 to -0.25 | -0.05                                      | -0.19 to 0.09  | .50   | -0.07           | -0.05                               | -0.29 to 0.18  | .67  | -0.05 | 1261.08 | 1385.96         |
|                                           |                                           | Exemestane | -0.23                  | -0.36 to -0.09 | -0.06 | -0.20 to 0.08  | -0.35 | -0.51 to -0.19 | 0.15                                       | 0.02 to 0.28   | .02   | 0.22            | 0.02                                | -0.19 to 0.24  | .82  | 0.03  |         |                 |
|                                           |                                           | Control    | -0.03                  | -0.16 to 0.10  | -0.02 | -0.15 to 0.11  | -0.18 | -0.35 to -0.01 |                                            |                |       |                 |                                     |                |      |       |         |                 |
| Stroop card 1 <sup>c</sup>                | .70                                       | Sequential | -0.29                  | -0.50 to -0.08 | -0.30 | -0.52 to -0.07 | -0.67 | -0.95 to -0.39 | 0.11                                       | -0.13 to 0.35  | .36   | 0.09            | -0.03                               | -0.40 to 0.34  | .89  | -0.02 | 1893.65 | 2041.67         |
|                                           |                                           | Exemestane | -0.21                  | -0.40 to -0.03 | -0.19 | -0.38 to 0.01  | -0.52 | -0.75 to -0.28 | 0.14                                       | -0.07 to 0.36  | .19   | 0.13            | 0.05                                | -0.29 to 0.39  | .78  | 0.03  |         |                 |
|                                           |                                           | Control    | -0.05                  | -0.22 to 0.13  | -0.16 | -0.34 to 0.02  | -0.40 | -0.65 to -0.15 |                                            |                |       |                 |                                     |                |      |       |         |                 |
| Stroop card 2 <sup>b</sup>                | .35                                       | Sequential | -0.20                  | -0.40 to -0.01 | -0.23 | -0.43 to -0.02 | -0.28 | -0.52 to -0.03 | -0.08                                      | -0.26 to 0.10  | .38   | -0.08           | 0.01                                | -0.27 to 0.30  | .92  | 0.01  | 1645.12 | 1770.11         |
|                                           |                                           | Exemestane | -0.17                  | -0.35 to 0.01  | -0.02 | -0.20 to 0.16  | -0.22 | -0.42 to -0.01 | 0.10                                       | -0.06 to 0.27  | .23   | 0.12            | 0.04                                | -0.22 to 0.31  | .74  | 0.04  |         |                 |
|                                           |                                           | Control    | 0.00                   | -0.17 to 0.17  | 0.05  | -0.12 to 0.22  | -0.09 | -0.30 to 0.13  |                                            |                |       |                 |                                     |                |      |       |         |                 |
| Trail Making Test A <sup>c</sup>          | .006                                      | Sequential | -0.21                  | -0.40 to -0.03 | -0.26 | -0.46 to -0.07 | -0.36 | -0.61 to -0.11 | -0.17                                      | -0.38 to 0.05  | .13   | -0.15           | -0.23                               | -0.57 to 0.10  | .17  | -0.16 | 1724.82 | 1872.70         |
|                                           |                                           | Exemestane | -0.30                  | -0.47 to -0.14 | 0.02  | -0.15 to 0.19  | -0.34 | -0.55 to -0.13 | 0.21                                       | 0.01 to 0.41   | .04   | 0.21            | -0.12                               | -0.43 to 0.18  | .43  | -0.09 |         |                 |
|                                           |                                           | Control    | -0.05                  | -0.21 to 0.11  | 0.06  | -0.10 to 0.22  | 0.03  | -0.20 to 0.26  |                                            |                |       |                 |                                     |                |      |       |         |                 |
| Executive functioning <sup>c</sup>        | .005                                      | Sequential | -0.22                  | -0.41 to -0.04 | -0.33 | -0.52 to -0.14 | -0.55 | -0.77 to -0.32 | -0.22                                      | -0.37 to -0.06 | .007  | -0.27           | -0.41                               | -0.68 to -0.15 | .002 | -0.38 | 1475.47 | 1623.23         |
|                                           |                                           | Exemestane | -0.35                  | -0.51 to -0.18 | -0.21 | -0.38 to -0.04 | -0.41 | -0.60 to -0.21 | 0.03                                       | -0.11 to 0.17  | .69   | 0.04            | -0.15                               | -0.39 to 0.09  | .22  | -0.15 |         |                 |
|                                           |                                           | Control    | -0.05                  | -0.20 to 0.11  | 0.06  | -0.10 to 0.22  | 0.04  | -0.16 to 0.24  |                                            |                |       |                 |                                     |                |      |       |         |                 |
| Stroop card 3 <sup>c</sup>                | .07                                       | Sequential | -0.24                  | -0.44 to -0.03 | -0.35 | -0.56 to -0.13 | -0.53 | -0.80 to -0.25 | -0.22                                      | -0.45 to 0.00  | .05   | -0.19           | -0.38                               | -0.75 to 0.00  | .047 | -0.17 | 1843.34 | 1986.69         |
|                                           |                                           | Exemestane | -0.36                  | -0.55 to -0.18 | -0.22 | -0.41 to -0.03 | -0.17 | -0.40 to 0.06  | 0.03                                       | -0.18 to 0.24  | .79   | 0.03            | 0.10                                | -0.24 to 0.45  | .55  | 0.05  |         |                 |
|                                           |                                           | Control    | -0.05                  | -0.22 to 0.13  | 0.07  | -0.11 to 0.24  | 0.04  | -0.20 to 0.29  |                                            |                |       |                 |                                     |                |      |       |         |                 |
| Table continues                           |                                           |            |                        |                |       |                |       |                |                                            |                |       |                 |                                     |                |      |       |         |                 |
| Trail Making Test B <sup>c</sup>          | .005                                      | Sequential | -0.19                  | -0.45 to 0.08  | -0.30 | -0.53 to -0.07 | -0.35 | -0.68 to -0.01 | -0.20                                      | -0.41 to 0.00  | .049  | -0.20           | -0.49                               | -0.84 to -0.13 | .007 | -0.24 | 1800.92 | 1976.44         |
|                                           |                                           | Exemestane | -0.47                  | -0.71 to -0.23 | -0.18 | -0.39 to 0.02  | -0.52 | -0.79 to -0.26 | 0.02                                       | -0.17 to 0.20  | .87   | 0.02            | -0.43                               | -0.75 to -0.10 | .01  | -0.23 |         |                 |
|                                           |                                           | Control    | -0.03                  | -0.43 to 0.37  | 0.05  | -0.14 to 0.24  | 0.02  | -0.27 to 0.31  |                                            |                |       |                 |                                     |                |      |       |         |                 |
| Motor speed <sup>f</sup>                  |                                           | Sequential | -0.02                  | -0.18 to 0.14  | -0.01 | -0.17 to 0.16  | -0.22 | -0.41 to -0.02 | -0.08                                      | -0.22 to 0.06  | .25   | -0.11           | -0.21                               | -0.43 to 0.02  | .07  | -0.22 |         |                 |

|                                                                  |      |            |       |                |       |                |       |                |       |                |      |       |       |               |      |       |         |         |
|------------------------------------------------------------------|------|------------|-------|----------------|-------|----------------|-------|----------------|-------|----------------|------|-------|-------|---------------|------|-------|---------|---------|
|                                                                  | .31  | Exemestane | -0.05 | -0.20 to 0.09  | 0.01  | -0.14 to 0.16  | -0.22 | -0.39 to -0.06 | -0.03 | -0.16 to 0.10  | .62  | -0.05 | -0.18 | -0.39 to 0.02 | .08  | -0.22 | 1292.93 | 1417.82 |
|                                                                  |      | Control    | -0.08 | -0.21 to 0.06  | 0.02  | -0.12 to 0.16  | -0.07 | -0.23 to 0.10  |       |                |      |       |       |               |      |       |         |         |
| FePsy<br>Fingertapping<br>dominant<br>hand <sup>f</sup>          | .24  | Exemestane | -0.01 | -0.17 to 0.15  | 0.03  | -0.13 to 0.20  | -0.18 | -0.38 to 0.02  | -0.04 | -0.19 to 0.11  | .58  | -0.05 | -0.22 | -0.46 to 0.03 | .08  | -0.21 |         |         |
|                                                                  |      | Control    | -0.08 | -0.22 to 0.06  | 0.01  | -0.13 to 0.15  | -0.03 | -0.20 to 0.14  |       |                |      |       |       |               |      |       | 1357.80 | 1482.73 |
| FePsy<br>Fingertapping<br>non-dominant<br>hand <sup>f</sup>      | .44  | Exemestane | -0.02 | -0.19 to 0.16  | -0.03 | -0.22 to 0.15  | -0.24 | -0.45 to -0.02 | -0.12 | -0.27 to 0.03  | .13  | -0.15 | -0.17 | -0.41 to 0.07 | .16  | -0.18 |         |         |
|                                                                  |      | Control    | -0.13 | -0.28 to 0.03  | -0.04 | -0.20 to 0.12  | -0.29 | -0.47 to -0.11 | -0.02 | -0.16 to 0.12  | .80  | -0.03 | -0.12 | -0.34 to 0.10 | .28  | -0.14 | 1437.64 | 1562.53 |
| Verbal<br>fluency <sup>g</sup>                                   | .76  | Exemestane | -0.39 | -0.53 to -0.25 | -0.39 | -0.54 to -0.25 | -0.39 | -0.57 to -0.21 | -0.02 | -0.15 to 0.10  | .70  | -0.04 | 0.06  | -0.12 to 0.25 | .49  | 0.09  |         |         |
|                                                                  |      | Control    | -0.42 | -0.54 to -0.29 | -0.37 | -0.50 to -0.24 | -0.48 | -0.63 to -0.34 | 0.03  | -0.09 to 0.14  | .66  | 0.04  | 0.00  | -0.16 to 0.16 | >.99 | 0.00  | 1140.02 | 1242.04 |
| Letterfluency <sup>b</sup>                                       | .78  | Exemestane | -0.09 | -0.21 to 0.03  | -0.07 | -0.19 to 0.05  | -0.16 | -0.30 to -0.01 |       |                |      |       |       |               |      |       |         |         |
|                                                                  |      | Control    | -0.37 | -0.55 to -0.19 | -0.35 | -0.54 to -0.16 | -0.22 | -0.44 to 0.01  | -0.09 | -0.26 to 0.08  | .29  | -0.11 | 0.02  | -0.24 to 0.27 | .90  | 0.02  |         |         |
|                                                                  |      | Exemestane | -0.41 | -0.57 to -0.25 | -0.31 | -0.47 to -0.14 | -0.27 | -0.46 to -0.08 | -0.01 | -0.16 to 0.15  | .94  | -0.01 | 0.00  | -0.23 to 0.24 | .97  | 0.00  | 1490.45 | 1615.23 |
|                                                                  |      | Control    | -0.07 | -0.22 to 0.09  | 0.05  | -0.11 to 0.20  | 0.07  | -0.12 to 0.27  |       |                |      |       |       |               |      |       |         |         |
| Category<br>fluency -<br>Animals <sup>b</sup>                    | .91  | Exemestane | -0.35 | -0.54 to -0.16 | -0.41 | -0.61 to -0.21 | -0.51 | -0.77 to -0.25 | -0.06 | -0.30 to 0.18  | .62  | -0.05 | -0.11 | -0.45 to 0.23 | .52  | -0.07 |         |         |
|                                                                  |      | Control    | -0.34 | -0.50 to -0.17 | -0.36 | -0.54 to -0.19 | -0.52 | -0.73 to -0.31 | -0.03 | -0.25 to 0.19  | .81  | -0.02 | -0.14 | -0.45 to 0.17 | .38  | -0.10 | 1793.08 | 1917.96 |
|                                                                  |      | Exemestane | -0.06 | -0.22 to 0.10  | -0.06 | -0.23 to 0.10  | -0.11 | -0.34 to 0.12  |       |                |      |       |       |               |      |       |         |         |
| Category<br>fluency -<br>Professions <sup>c</sup>                | .22  | Exemestane | -0.43 | -0.64 to -0.22 | -0.38 | -0.57 to -0.20 | -0.26 | -0.53 to 0.00  | 0.10  | -0.12 to 0.32  | .38  | -0.02 | 0.16  | -0.21 to 0.53 | .38  | 0.13  |         |         |
|                                                                  |      | Control    | -0.52 | -0.71 to -0.33 | -0.40 | -0.56 to -0.23 | -0.53 | -0.75 to -0.32 | 0.18  | -0.02 to 0.39  | .08  | -0.06 | -0.01 | -0.35 to 0.32 | .93  | -0.13 | 1684.64 | 1860.20 |
|                                                                  |      | Exemestane | -0.27 | -0.47 to -0.06 | -0.40 | -0.62 to -0.18 | -0.27 | -0.55 to 0.00  | -0.12 | -0.35 to 0.11  | .305 | -0.10 | 0.05  | -0.30 to 0.40 | .76  | 0.04  |         |         |
| Reaction<br>speed <sup>b</sup>                                   | .523 | Control    | -0.22 | -0.40 to -0.03 | -0.16 | -0.36 to 0.03  | -0.25 | -0.49 to -0.02 | 0.06  | -0.15 to 0.27  | .573 | 0.06  | 0.02  | -0.30 to 0.35 | .89  | 0.02  | 1813.94 | 1938.06 |
|                                                                  |      | Exemestane | 0.02  | -0.16 to 0.19  | 0.01  | -0.17 to 0.19  | -0.05 | -0.30 to 0.20  |       |                |      |       |       |               |      |       |         |         |
| FePsy<br>Reaction<br>Time<br>dominant<br>hand <sup>b</sup>       | .04  | Exemestane | -0.17 | -0.39 to 0.06  | -0.47 | -0.71 to -0.23 | -0.22 | -0.53 to 0.08  | -0.39 | -0.68 to -0.10 | .008 | -0.28 | -0.10 | -0.50 to 0.30 | .62  | -0.07 |         |         |
|                                                                  |      | Control    | -0.23 | -0.44 to -0.03 | -0.11 | -0.32 to 0.10  | -0.22 | -0.48 to 0.04  | 0.03  | -0.24 to 0.30  | .83  | 0.02  | -0.03 | -0.40 to 0.34 | .87  | -0.02 | 2026.97 | 2151.20 |
|                                                                  |      | Exemestane | 0.02  | -0.17 to 0.22  | 0.12  | -0.08 to 0.31  | 0.07  | -0.22 to 0.35  |       |                |      |       |       |               |      |       |         |         |
| FePsy<br>Reaction<br>Times non-<br>dominant<br>hand <sup>b</sup> | .84  | Exemestane | -0.33 | -0.56 to -0.11 | -0.31 | -0.55 to -0.08 | -0.29 | -0.58 to 0.01  | 0.13  | -0.14 to 0.40  | .33  | 0.10  | 0.17  | -0.23 to 0.57 | .41  | 0.11  |         |         |
|                                                                  |      | Control    | -0.20 | -0.40 to 0.00  | -0.22 | -0.43 to -0.01 | -0.28 | -0.54 to -0.03 | 0.09  | -0.16 to 0.33  | .49  | 0.07  | 0.04  | -0.34 to 0.41 | .84  | 0.03  | 1961.66 | 2085.78 |
|                                                                  |      | Exemestane | 0.01  | -0.18 to 0.19  | -0.10 | -0.30 to 0.09  | -0.12 | -0.39 to 0.16  |       |                |      |       |       |               |      |       |         |         |
| Working<br>memory <sup>g</sup>                                   | .21  | Exemestane | -0.33 | -0.51 to -0.15 | -0.16 | -0.35 to 0.03  | -0.43 | -0.70 to -0.15 | 0.12  | -0.14 to 0.38  | .36  | 0.09  | -0.23 | -0.62 to 0.16 | .24  | -0.13 |         |         |
|                                                                  |      | Control    | -0.30 | -0.46 to -0.13 | -0.20 | -0.37 to -0.03 | -0.45 | -0.67 to -0.24 | 0.04  | -0.20 to 0.29  | .72  | 0.03  | -0.30 | -0.65 to 0.05 | .10  | -0.19 | 1833.39 | 1935.06 |
|                                                                  |      | Exemestane | -0.06 | -0.21 to 0.10  | -0.01 | -0.16 to 0.15  | 0.08  | -0.14 to 0.31  |       |                |      |       |       |               |      |       |         |         |

Abbreviations: T0, baseline; T1; 1 year follow-up; T2, 5 year follow-up; CI, confidence interval; ES, effect size; RAVLT, Rey Auditory Verbal Learning Test; VAT, Visual Association Test; WMS, Wechsler Memory Scale; IR, immediate recall; DR, delayed recall; AIC, Akaike information criterion; BIC, Bayesian information criterion.

<sup>a</sup> Effect sizes: .20 small effect, .50 moderate effect, .80 large effect.

<sup>b</sup> Adjusted for age, IQ, FACT-ES.

<sup>c</sup> Adjusted for age, IQ, HSCL, FACT-ES.

<sup>d</sup> Adjusted for age, HSCL, FACT-ES.

<sup>e</sup> Adjusted for pattern missing, age, IQ, HSCL, FACT-ES.

<sup>f</sup> Adjusted for age, IQ, HSCL.

<sup>g</sup> Adjusted for age, IQ.

<sup>h</sup> Adjusted for IQ, HSCL, FACT-ES.



Table  
continues

|                                                                  |      |            |       |                |       |                |       |                |       |               |     |       |       |                |     |       |         |         |
|------------------------------------------------------------------|------|------------|-------|----------------|-------|----------------|-------|----------------|-------|---------------|-----|-------|-------|----------------|-----|-------|---------|---------|
| Motor speed <sup>c</sup>                                         | .15  | Sequential | 0.04  | -0.15 to 0.21  | 0.02  | -0.17 to 0.20  | -0.24 | -0.47 to -0.01 | -0.11 | -0.25 to 0.04 | .14 | -0.15 | -0.29 | -0.54 to -0.04 | .02 | -0.22 | 1089.61 | 1205.85 |
|                                                                  |      | Exemestane | -0.09 | -0.25 to 0.07  | 0.04  | -0.13 to 0.20  | -0.15 | -0.34 to 0.05  | 0.03  | -0.10 to 0.16 | .63 | 0.05  | -0.07 | -0.30 to 0.15  | .52 | -0.06 |         |         |
|                                                                  |      | Control    | -0.06 | -0.19 to 0.08  | 0.04  | -0.10 to 0.17  | -0.04 | -0.20 to 0.12  |       |               |     |       |       |                |     |       |         |         |
| FePsy<br>Fingertapping<br>dominant<br>hand <sup>d</sup>          | .32  | Sequential | 0.03  | -0.15 to 0.21  | 0.05  | -0.13 to 0.24  | -0.19 | -0.43 to 0.05  | -0.06 | -0.22 to 0.09 | .42 | -0.08 | -0.27 | -0.53 to 0.00  | .05 | -0.18 | 1139.89 | 1256.17 |
|                                                                  |      | Exemestane | -0.02 | -0.17 to 0.15  | 0.09  | -0.07 to 0.25  | -0.08 | -0.28 to 0.12  | 0.02  | -0.12 to 0.16 | .79 | 0.03  | -0.11 | -0.35 to 0.13  | .36 | -0.09 |         |         |
|                                                                  |      | Control    | -0.06 | -0.19 to 0.08  | 0.03  | -0.11 to 0.16  | -0.01 | -0.18 to 0.15  |       |               |     |       |       |                |     |       |         |         |
| FePsy<br>Fingertapping<br>non-dominant<br>hand <sup>d</sup>      | .12  | Sequential | 0.05  | -0.15 to 0.24  | -0.01 | -0.21 to 0.20  | -0.27 | -0.53 to -0.02 | -0.16 | -0.32 to 0.01 | .06 | -0.19 | -0.31 | -0.59 to -0.02 | .03 | -0.20 | 1224.24 | 1340.48 |
|                                                                  |      | Exemestane | -0.16 | -0.34 to 0.01  | -0.02 | -0.20 to 0.16  | -0.21 | -0.42 to 0.01  | 0.04  | -0.10 to 0.19 | .55 | 0.06  | -0.03 | -0.28 to 0.22  | .81 | -0.02 |         |         |
|                                                                  |      | Control    | -0.05 | -0.20 to 0.09  | 0.05  | -0.10 to 0.19  | -0.07 | -0.25 to 0.11  |       |               |     |       |       |                |     |       |         |         |
| Verbal<br>fluency <sup>e</sup>                                   | .82  | Sequential | -1.16 | -1.63 to -0.68 | -1.11 | -1.61 to -0.61 | -1.08 | -1.73 to -0.43 | 0.01  | -0.42 to 0.44 | .97 | 0.00  | 0.19  | -0.50 to 0.89  | .59 | 0.07  | 2409.68 | 2530.31 |
|                                                                  |      | Exemestane | -1.31 | -1.73 to -0.88 | -1.15 | -1.58 to -0.71 | -1.51 | -2.04 to -0.98 | 0.12  | -0.27 to 0.51 | .54 | 0.07  | -0.09 | -0.70 to 0.52  | .76 | -0.04 |         |         |
|                                                                  |      | Control    | -0.14 | -0.50 to 0.22  | -0.10 | -0.47 to 0.26  | -0.26 | -0.72 to 0.21  |       |               |     |       |       |                |     |       |         |         |
| Letterfluency <sup>e</sup>                                       | .75  | Sequential | -0.36 | -0.56 to -0.16 | -0.34 | -0.55 to -0.13 | -0.18 | -0.45 to 0.09  | -0.10 | -0.28 to 0.08 | .27 | -0.12 | -0.01 | -0.31 to 0.28  | .93 | -0.01 | 1283.05 | 1403.59 |
|                                                                  |      | Exemestane | -0.45 | -0.63 to -0.27 | -0.33 | -0.51 to -0.15 | -0.30 | -0.52 to -0.08 | 0.00  | -0.16 to 0.16 | .96 | 0.00  | -0.04 | -0.30 to 0.23  | .78 | -0.04 |         |         |
|                                                                  |      | Control    | -0.05 | -0.20 to 0.10  | 0.07  | -0.08 to 0.22  | 0.14  | -0.06 to 0.34  |       |               |     |       |       |                |     |       |         |         |
| Category<br>fluency -<br>Animals <sup>e</sup>                    | .99  | Sequential | -0.39 | -0.60 to -0.18 | -0.41 | -0.63 to -0.18 | -0.55 | -0.87 to -0.23 | -0.01 | -0.27 to 0.25 | .93 | -0.01 | -0.08 | -0.47 to 0.31  | .70 | -0.05 | 1551.23 | 1671.94 |
|                                                                  |      | Exemestane | -0.36 | -0.55 to -0.18 | -0.42 | -0.61 to -0.22 | -0.53 | -0.80 to -0.27 | -0.05 | -0.28 to 0.19 | .70 | -0.04 | -0.09 | -0.44 to 0.26  | .62 | -0.06 |         |         |
|                                                                  |      | Control    | -0.04 | -0.20 to 0.12  | -0.05 | -0.21 to 0.12  | -0.12 | -0.35 to 0.11  |       |               |     |       |       |                |     |       |         |         |
| Category<br>fluency -<br>Professions <sup>f</sup>                | .34  | Sequential | -0.42 | -0.64 to -0.19 | -0.34 | -0.56 to -0.13 | -0.17 | -0.50 to 0.16  | 0.12  | -0.12 to 0.37 | .32 | 0.11  | 0.17  | -0.19 to 0.54  | .36 | 0.13  | 1445.47 | 1619.53 |
|                                                                  |      | Exemestane | -0.48 | -0.67 to -0.28 | -0.40 | -0.58 to -0.22 | -0.57 | -0.84 to -0.30 | 0.17  | -0.05 to 0.40 | .13 | 0.17  | -0.05 | -0.38 to 0.27  | .74 | -0.05 |         |         |
|                                                                  |      | Control    | -0.10 | -0.41 to 0.22  | -0.14 | -0.28 to 0.01  | -0.13 | -0.37 to 0.10  |       |               |     |       |       |                |     |       |         |         |
| Reaction<br>speed <sup>e</sup>                                   | >.99 | Sequential | 0.28  | 0.02 to 0.55   | 0.27  | -0.02 to 0.55  | 0.08  | -0.29 to 0.45  | 0.06  | -0.24 to 0.36 | .70 | 0.04  | 0.03  | -0.41 to 0.47  | .89 | 0.01  | 1727.05 | 1842.60 |
|                                                                  |      | Exemestane | 0.22  | -0.01 to 0.46  | 0.17  | -0.07 to 0.42  | -0.02 | -0.33 to 0.29  | 0.02  | -0.25 to 0.30 | .86 | 0.02  | -0.01 | -0.41 to 0.39  | .95 | -0.01 |         |         |
|                                                                  |      | Control    | 0.03  | -0.17 to 0.22  | -0.05 | -0.25 to 0.15  | -0.21 | -0.49 to 0.08  |       |               |     |       |       |                |     |       |         |         |
| FePsy<br>Reaction<br>Time<br>dominant<br>hand <sup>b</sup>       | .84  | Sequential | 0.17  | -0.12 to 0.47  | 0.25  | -0.07 to 0.57  | -0.15 | -0.59 to 0.29  | 0.23  | -0.15 to 0.60 | .24 | 0.12  | 0.07  | -0.48 to 0.63  | .80 | 0.03  | 1944.56 | 2082.28 |
|                                                                  |      | Exemestane | 0.24  | -0.02 to 0.50  | 0.20  | -0.07 to 0.48  | -0.09 | -0.46 to 0.29  | 0.11  | -0.24 to 0.45 | .55 | 0.06  | 0.07  | -0.44 to 0.58  | .79 | 0.03  |         |         |
|                                                                  |      | Control    | 0.05  | -0.17 to 0.27  | -0.10 | -0.32 to 0.13  | -0.35 | -0.69 to 0.00  |       |               |     |       |       |                |     |       |         |         |
| FePsy<br>Reaction<br>Times non-<br>dominant<br>hand <sup>b</sup> | .71  | Sequential | 0.59  | 0.31 to 0.87   | 0.42  | 0.11 to 0.72   | 0.41  | 0.01 to 0.82   | -0.20 | -0.53 to 0.13 | .23 | -0.13 | -0.16 | -0.63 to 0.31  | .50 | -0.07 | 1846.77 | 1917.87 |
|                                                                  |      | Exemestane | 0.34  | 0.09 to 0.60   | 0.23  | -0.04 to 0.49  | 0.12  | -0.22 to 0.47  | -0.14 | -0.44 to 0.16 | .35 | -0.10 | -0.20 | -0.63 to 0.23  | .35 | -0.09 |         |         |
|                                                                  |      | Control    | -0.03 | -0.24 to 0.19  | 0.00  | -0.22 to 0.22  | -0.05 | -0.34 to 0.25  |       |               |     |       |       |                |     |       |         |         |
| Working<br>memory <sup>b</sup>                                   | .13  | Sequential | -0.41 | -0.61 to -0.20 | -0.20 | -0.42 to 0.02  | -0.56 | -0.89 to -0.22 | 0.13  | -0.15 to 0.40 | .36 | 0.10  | -0.33 | -0.77 to 0.10  | .13 | -0.17 | 1578.58 | 1654.56 |
|                                                                  |      | Exemestane | -0.30 | -0.48 to -0.12 | -0.19 | -0.38 to 0.00  | -0.45 | -0.72 to -0.19 | 0.04  | -0.22 to 0.29 | .77 | 0.03  | -0.33 | -0.72 to 0.05  | .09 | -0.21 |         |         |
|                                                                  |      | Control    | -0.03 | -0.18 to 0.13  | 0.05  | -0.11 to 0.20  | 0.15  | -0.07 to 0.38  |       |               |     |       |       |                |     |       |         |         |

Abbreviations: T0, baseline; T1; 1 year follow-up; T2, 5 year follow-up; CI, confidence interval; ES, effect size; RAVLT, Rey Auditory Verbal Learning Test; IR, immediate recall; DR, delayed recall; VAT, Visual Association Test; WMS, Wechsler Memory Scale; AIC, Akaike information criterion; BIC, Bayesian information criterion.

<sup>a</sup> Effect sizes: .20 small effect, .50 moderate effect, .80 large effect.

<sup>b</sup> Adjusted for age, IQ, HSCL, FACT-ES.

<sup>c</sup> Adjusted for age, IQ, FACT-ES.

<sup>d</sup> Adjusted for age, FACT-ES.

<sup>e</sup> Adjusted for age, IQ, HSCL.

<sup>f</sup> Adjusted for pattern missing, age, IQ, HSCL, FACT-ES.

<sup>g</sup> Adjusted for FACT-ES.

<sup>h</sup> Adjusted for IQ.

**Supplementary Table 4. Results of the intention-to-treat analyses of the Sequential and the Exemestane group.**



Table  
continues

|                                                            |     |            |       |                |       |                |       |                |       |                    |     |       |       |               |     |       |         |         |
|------------------------------------------------------------|-----|------------|-------|----------------|-------|----------------|-------|----------------|-------|--------------------|-----|-------|-------|---------------|-----|-------|---------|---------|
| Category<br>fluency -<br>Professions <sup>d</sup>          | .16 | Sequential | -0.54 | -0.69 to -0.38 | -0.51 | -0.68 to -0.34 | -0.44 | -0.67 to -0.21 | -0.09 | -0.31 to 0.12      | .41 | -0.10 | 0.18  | -0.14 to 0.51 | .27 | 0.11  | 993.84  | 1076.46 |
|                                                            |     | Exemestane | -0.57 | -0.72 to -0.43 | -0.46 | -0.61 to -0.30 | -0.66 | -0.85 to -0.47 |       |                    |     |       |       |               |     |       |         |         |
| Reaction<br>speed <sup>h</sup>                             | .24 | Sequential | -0.33 | -0.55 to -0.11 | -0.43 | -0.66 to -0.20 | -0.32 | -0.61 to -0.02 | -0.18 | -0.44 to 0.07      | .15 | -0.19 | 0.03  | -0.33 to 0.39 | .87 | 0.03  | 1178.79 | 1265.04 |
|                                                            |     | Exemestane | -0.25 | -0.46 to -0.05 | -0.17 | -0.38 to 0.03  | -0.27 | -0.52 to -0.02 |       |                    |     |       |       |               |     |       |         |         |
| FePsy Reaction<br>Time dominant<br>hand <sup>b</sup>       | .03 | Sequential | -0.22 | -0.46 to 0.02  | -0.50 | -0.76 to -0.25 | -0.25 | -0.57 to 0.08  | -0.43 | -0.76 to -<br>0.10 | .01 | -0.35 | -0.06 | -0.46 to 0.34 | .78 | -0.05 | 1326.08 | 1412.47 |
|                                                            |     | Exemestane | -0.26 | -0.48 to -0.04 | -0.12 | -0.34 to 0.11  | -0.23 | -0.51 to 0.04  |       |                    |     |       |       |               |     |       |         |         |
| FePsy Reaction<br>Times non-<br>dominant hand <sup>b</sup> | .83 | Sequential | -0.41 | -0.64 to -0.17 | -0.35 | -0.59 to -0.10 | -0.32 | -0.64 to 0.00  | 0.04  | -0.24 to 0.33      | .76 | 0.04  | 0.13  | -0.29 to 0.55 | .55 | 0.10  | 1266.74 | 1352.99 |
|                                                            |     | Exemestane | -0.25 | -0.46 to -0.03 | -0.23 | -0.45 to -0.01 | -0.29 | -0.56 to -0.02 |       |                    |     |       |       |               |     |       |         |         |
| Working<br>memory <sup>b</sup>                             | .87 | Sequential | -0.43 | -0.61 to -0.25 | -0.27 | -0.46 to -0.08 | -0.56 | -0.84 to -0.28 | 0.07  | -0.20 to 0.34      | .61 | 0.06  | 0.06  | -0.34 to 0.45 | .78 | 0.04  | 1133.66 | 1203.85 |
|                                                            |     | Exemestane | -0.39 | -0.55 to -0.23 | -0.30 | -0.47 to -0.13 | -0.58 | -0.79 to -0.36 |       |                    |     |       |       |               |     |       |         |         |

Abbreviations: T0, baseline; T1; 1 year follow-up; T2, 5 year follow-up; CI, confidence interval; ES, effect size; RAVLT, Rey Auditory Verbal Learning Test; IR, immediate recall; DR, delayed recall; VAT, Visual Association Test; WMS, Wechsler Memory Scale; AIC, Akaike information criterion; BIC, Bayesian information criterion.

<sup>a</sup> Effect sizes: .20 small effect, .50 moderate effect, .80 large effect.

<sup>b</sup> Adjusted for age, IQ.

<sup>c</sup> Adjusted for age, IQ, HSCL, FACT-ES.

<sup>d</sup> Adjusted for age, IQ, FACT-ES.

<sup>e</sup> Adjusted for age, HSCL, FACT-ES.

<sup>f</sup> Adjusted for pattern missing, age, IQ, FACT-ES.

<sup>g</sup> Adjusted for age, IQ, HSCL.

<sup>h</sup> Adjusted for IQ, HSCL, FACT-ES.

Supplementary Table 5. Results of the per-protocol analyses of the Sequential and the Exemestane group.

| Adjusted mean Z-scores |    |    | Sequential group vs exemestane |       |
|------------------------|----|----|--------------------------------|-------|
| T0                     | T1 | T2 | T0-T1                          | T0-T2 |

| Cognitive domain/test                              | P-value overall group-by-time interaction | Group      | Mean  | 95% CI         | Mean  | 95% CI         | Mean  | 95% CI         | Mean difference in change over time | 95% CI         | p    | ES <sup>a</sup> | Mean difference in change over time | 95% CI         | p   | ES <sup>a</sup> | AIC     | BIC     |
|----------------------------------------------------|-------------------------------------------|------------|-------|----------------|-------|----------------|-------|----------------|-------------------------------------|----------------|------|-----------------|-------------------------------------|----------------|-----|-----------------|---------|---------|
| Verbal memory <sup>b</sup>                         | .03                                       | Sequential | 0.03  | -0.54 to 0.59  | -0.09 | -0.68 to 0.49  | -1.16 | -2.02 to -0.30 | -0.59                               | -1.13 to -0.05 | .03  | -0.32           | -1.19                               | -2.20 to -0.19 | .02 | -0.42           | 1448.41 | 1544.35 |
|                                                    |                                           | Exemestane | -0.66 | -1.17 to -0.14 | -0.19 | -0.72 to 0.34  | -0.65 | -1.33 to 0.03  |                                     |                |      |                 |                                     |                |     |                 |         |         |
| RAVLT IR <sup>c</sup>                              | .12                                       | Sequential | 0.01  | -0.21 to 0.23  | -0.06 | -0.29 to 0.18  | -0.38 | -0.71 to -0.05 | -0.22                               | -0.50 to 0.05  | .11  | -0.23           | -0.38                               | -0.79 to 0.03  | .07 | -0.36           | 903.49  | 984.86  |
|                                                    |                                           | Exemestane | -0.33 | -0.53 to -0.14 | -0.17 | -0.38 to 0.03  | -0.35 | -0.62 to -0.07 |                                     |                |      |                 |                                     |                |     |                 |         |         |
| RAVLT DR <sup>d</sup>                              | .19                                       | Sequential | 0.07  | -0.16 to 0.30  | -0.02 | -0.27 to 0.22  | -0.18 | -0.49 to 0.13  | -0.20                               | -0.45 to 0.04  | .11  | -0.24           | -0.24                               | -0.59 to 0.11  | .17 | -0.31           | 859.85  | 925.53  |
|                                                    |                                           | Exemestane | -0.13 | -0.34 to 0.08  | -0.02 | -0.24 to 0.20  | -0.14 | -0.40 to 0.13  |                                     |                |      |                 |                                     |                |     |                 |         |         |
| VAT <sup>d</sup>                                   | .40                                       | Sequential | 0.01  | -0.28 to 0.30  | 0.00  | -0.31 to 0.31  | -0.19 | -0.67 to 0.29  | -0.23                               | -0.57 to 0.11  | .19  | -0.20           | -0.07                               | -0.67 to 0.54  | .83 | -0.04           | 1037.77 | 1102.97 |
|                                                    |                                           | Exemestane | -0.19 | -0.46 to 0.07  | 0.02  | -0.25 to 0.29  | -0.32 | -0.70 to 0.05  |                                     |                |      |                 |                                     |                |     |                 |         |         |
| Visual memory <sup>b</sup>                         | .45                                       | Sequential | -0.94 | -1.38 to -0.50 | -0.90 | -1.36 to -0.44 | -0.93 | -1.52 to -0.33 | -0.22                               | -0.65 to 0.21  | .32  | -0.15           | 0.12                                | -0.55 to 0.80  | .72 | 0.07            | 1303.54 | 1400.06 |
|                                                    |                                           | Exemestane | -0.97 | -1.37 to -0.57 | -0.72 | -1.13 to -0.31 | -1.08 | -1.60 to -0.57 |                                     |                |      |                 |                                     |                |     |                 |         |         |
| WMS Visual Memory IR <sup>c</sup>                  | .55                                       | Sequential | -0.42 | -0.66 to -0.18 | -0.49 | -0.74 to -0.24 | -0.54 | -0.89 to -0.20 | -0.11                               | -0.37 to 0.14  | .38  | -0.13           | -0.20                               | -0.61 to 0.21  | .34 | -0.16           | 908.40  | 989.54  |
|                                                    |                                           | Exemestane | -0.46 | -0.68 to -0.24 | -0.41 | -0.64 to -0.19 | -0.38 | -0.67 to -0.10 |                                     |                |      |                 |                                     |                |     |                 |         |         |
| WMS Visual Memory DR <sup>c</sup>                  | .06                                       | Sequential | -0.53 | -0.77 to -0.29 | -0.46 | -0.71 to -0.20 | -0.33 | -0.65 to 0.00  | -0.13                               | -0.39 to 0.13  | .33  | -0.15           | 0.32                                | -0.04 to 0.68  | .08 | 0.37            | 882.07  | 963.02  |
|                                                    |                                           | Exemestane | -0.49 | -0.70 to -0.27 | -0.28 | -0.50 to -0.06 | -0.60 | -0.87 to -0.33 |                                     |                |      |                 |                                     |                |     |                 |         |         |
| Information processing speed <sup>e</sup>          | <.001                                     | Sequential | -0.32 | -0.49 to -0.15 | -0.39 | -0.57 to -0.21 | -0.47 | -0.70 to -0.23 | -0.27                               | -0.44 to -0.10 | .002 | -0.46           | 0.06                                | -0.23 to 0.35  | .69 | 0.05            | 638.50  | 715.77  |
|                                                    |                                           | Exemestane | -0.38 | -0.53 to -0.22 | -0.18 | -0.34 to -0.02 | -0.59 | -0.79 to -0.39 |                                     |                |      |                 |                                     |                |     |                 |         |         |
| Stroop card 1 <sup>c</sup>                         | .21                                       | Sequential | -0.34 | -0.57 to -0.11 | -0.42 | -0.67 to -0.18 | -0.62 | -0.95 to -0.29 | -0.17                               | -0.42 to 0.08  | .18  | -0.19           | 0.10                                | -0.33 to 0.52  | .66 | 0.07            | 889.67  | 970.87  |
|                                                    |                                           | Exemestane | -0.33 | -0.54 to -0.12 | -0.24 | -0.46 to -0.03 | -0.70 | -0.98 to -0.42 |                                     |                |      |                 |                                     |                |     |                 |         |         |
| Stroop card 2 <sup>c</sup>                         | .04                                       | Sequential | -0.28 | -0.49 to -0.06 | -0.30 | -0.52 to -0.08 | -0.27 | -0.56 to 0.02  | -0.22                               | -0.43 to -0.01 | .04  | -0.30           | 0.08                                | -0.28 to 0.43  | .67 | 0.09            | 791.12  | 872.31  |
|                                                    |                                           | Exemestane | -0.34 | -0.53 to -0.15 | -0.15 | -0.34 to 0.05  | -0.41 | -0.65 to -0.16 |                                     |                |      |                 |                                     |                |     |                 |         |         |
| Trail Making Test A <sup>d</sup>                   | .005                                      | Sequential | -0.34 | -0.58 to -0.10 | -0.43 | -0.68 to -0.17 | -0.49 | -0.84 to -0.13 | -0.41                               | -0.69 to -0.14 | .003 | -0.44           | 0.02                                | -0.43 to 0.46  | .94 | 0.01            | 922.64  | 988.32  |
|                                                    |                                           | Exemestane | -0.48 | -0.70 to -0.26 | -0.15 | -0.38 to 0.07  | -0.64 | -0.94 to -0.35 |                                     |                |      |                 |                                     |                |     |                 |         |         |
| Executive functioning <sup>e</sup>                 | .08                                       | Sequential | -0.35 | -0.59 to -0.11 | -0.46 | -0.71 to -0.21 | -0.65 | -0.97 to -0.32 | -0.24                               | -0.45 to -0.03 | .03  | -0.32           | -0.30                               | -0.68 to 0.07  | .11 | -0.22           | 834.05  | 911.21  |
|                                                    |                                           | Exemestane | -0.55 | -0.76 to -0.33 | -0.42 | -0.64 to -0.20 | -0.54 | -0.81 to -0.27 |                                     |                |      |                 |                                     |                |     |                 |         |         |
| Stroop card 3 <sup>b</sup>                         | .050                                      | Sequential | -0.33 | -0.59 to -0.07 | -0.45 | -0.73 to -0.17 | -0.59 | -0.97 to -0.20 | -0.29                               | -0.59 to 0.01  | .06  | -0.28           | -0.59                               | -1.10 to -0.08 | .02 | -0.29           | 993.04  | 1085.70 |
|                                                    |                                           | Exemestane | -0.60 | -0.83 to -0.36 | -0.43 | -0.68 to -0.18 | -0.26 | -0.59 to 0.07  |                                     |                |      |                 |                                     |                |     |                 |         |         |
| Trail Making Test B <sup>e</sup>                   | .20                                       | Sequential | -0.37 | -0.65 to -0.10 | -0.47 | -0.75 to -0.18 | -0.66 | -1.02 to -0.30 | -0.17                               | -0.42 to 0.08  | .18  | -0.21           | 0.12                                | -0.26 to 0.50  | .54 | 0.15            | 931.29  | 1012.31 |
|                                                    |                                           | Exemestane | -0.50 | -0.75 to -0.25 | -0.42 | -0.68 to -0.17 | -0.90 | -1.20 to -0.60 |                                     |                |      |                 |                                     |                |     |                 |         |         |
| Motor speed <sup>e</sup>                           | .17                                       | Sequential | -0.07 | -0.25 to 0.10  | -0.08 | -0.27 to 0.10  | -0.34 | -0.58 to -0.11 | -0.13                               | -0.29 to 0.02  | .09  | -0.25           | -0.21                               | -0.48 to 0.06  | .12 | -0.21           | 610.00  | 687.16  |
|                                                    |                                           | Exemestane | -0.17 | -0.33 to -0.01 | -0.05 | -0.21 to 0.12  | -0.23 | -0.42 to -0.03 |                                     |                |      |                 |                                     |                |     |                 |         |         |
| FePsy Fingertapping dominant hand <sup>e</sup>     | .47                                       | Sequential | -0.07 | -0.25 to 0.10  | -0.04 | -0.22 to 0.14  | -0.29 | -0.52 to -0.06 | -0.08                               | -0.24 to 0.07  | .30  | -0.15           | -0.15                               | -0.43 to 0.12  | .28 | -0.14           | 616.09  | 693.30  |
|                                                    |                                           | Exemestane | -0.11 | -0.26 to 0.05  | 0.01  | -0.15 to 0.16  | -0.17 | -0.37 to 0.02  |                                     |                |      |                 |                                     |                |     |                 |         |         |
| FePsy Fingertapping non-dominant hand <sup>f</sup> | .10                                       | Sequential | -0.08 | -0.28 to 0.12  | -0.13 | -0.34 to 0.08  | -0.38 | -0.65 to -0.12 | -0.19                               | -0.36 to -0.01 | .04  | -0.29           | -0.26                               | -0.57 to 0.05  | .10 | -0.22           | 707.65  | 769.38  |
|                                                    |                                           | Exemestane | -0.24 | -0.43 to -0.06 | -0.10 | -0.29 to 0.08  | -0.29 | -0.51 to -0.06 |                                     |                |      |                 |                                     |                |     |                 |         |         |
| Verbal fluency <sup>c</sup>                        | .43                                       | Sequential | -1.46 | -1.91 to -1.01 | -1.43 | -1.90 to -0.95 | -1.39 | -2.04 to -0.74 | -0.12                               | -0.59 to 0.35  | .62  | -0.07           | 0.35                                | -0.43 to 1.14  | .37 | 0.15            | 1338.65 | 1419.72 |
|                                                    |                                           | Exemestane | -1.68 | -2.09 to -1.27 | -1.53 | -1.95 to -1.11 | -1.96 | -2.50 to -1.43 |                                     |                |      |                 |                                     |                |     |                 |         |         |
| Letterfluency <sup>g</sup>                         | .49                                       | Sequential | -0.50 | -0.69 to -0.30 | -0.50 | -0.70 to -0.29 | -0.37 | -0.63 to -0.11 | -0.10                               | -0.28 to 0.08  | .28  | -0.16           | 0.01                                | -0.27 to 0.30  | .93 | 0.02            | 721.58  | 787.45  |
|                                                    |                                           | Exemestane | -0.57 | -0.74 to -0.39 | -0.46 | -0.64 to -0.28 | -0.45 | -0.67 to -0.24 |                                     |                |      |                 |                                     |                |     |                 |         |         |
| Category fluency - Animals <sup>c</sup>            | .96                                       | Sequential | -0.48 | -0.67 to -0.29 | -0.51 | -0.71 to -0.30 | -0.66 | -0.97 to -0.36 | 0.04                                | -0.23 to 0.31  | .78  | 0.04            | 0.03                                | -0.38 to 0.43  | .89 | 0.02            | 826.66  | 907.73  |
|                                                    |                                           | Exemestane | -0.49 | -0.66 to -0.32 | -0.55 | -0.73 to -0.37 | -0.70 | -0.95 to -0.45 |                                     |                |      |                 |                                     |                |     |                 |         |         |
| Category fluency - Professions <sup>c</sup>        | .44                                       | Sequential | -0.55 | -0.73 to -0.38 | -0.51 | -0.70 to -0.32 | -0.45 | -0.73 to -0.16 | -0.05                               | -0.30 to 0.20  | .70  | -0.06           | 0.19                                | -0.19 to 0.57  | .32 | 0.18            | 769.99  | 851.07  |
|                                                    |                                           | Exemestane | -0.61 | -0.77 to -0.45 | -0.51 | -0.68 to -0.35 | -0.69 | -0.93 to -0.46 |                                     |                |      |                 |                                     |                |     |                 |         |         |

Table continues



|                                                     |     |            |       |                |       |                |       |                |       |               |     |       |       |               |     |       |         |         |
|-----------------------------------------------------|-----|------------|-------|----------------|-------|----------------|-------|----------------|-------|---------------|-----|-------|-------|---------------|-----|-------|---------|---------|
| Reaction speed <sup>c</sup>                         | .92 | Sequential | 0.45  | 0.14 to 0.75   | 0.40  | 0.07 to 0.73   | 0.22  | -0.15 to 0.60  | 0.04  | -0.37 to 0.45 | .86 | 0.03  | 0.07  | -0.28 to 0.42 | .69 | 0.11  | 1053.04 | 1133.69 |
|                                                     |     | Exemestane | 0.32  | 0.05 to 0.60   | 0.24  | -0.05 to 0.52  | 0.03  | -0.29 to 0.35  |       |               |     |       |       |               |     |       |         |         |
| FePsy Reaction Time dominant hand <sup>b</sup>      | .89 | Sequential | 0.36  | 0.02 to 0.69   | 0.39  | 0.03 to 0.75   | -0.05 | -0.56 to 0.47  | 0.11  | -0.37 to 0.59 | .65 | 0.06  | -0.01 | -0.69 to 0.67 | .97 | -0.01 | 1198.88 | 1291.06 |
|                                                     |     | Exemestane | 0.35  | 0.04 to 0.66   | 0.27  | -0.05 to 0.59  | -0.04 | -0.49 to 0.41  |       |               |     |       |       |               |     |       |         |         |
| FePsy Reaction Times non-dominant hand <sup>b</sup> | .60 | Sequential | 0.53  | 0.21 to 0.86   | 0.37  | 0.02 to 0.72   | 0.51  | 0.11 to 0.91   | -0.07 | -0.50 to 0.36 | .74 | -0.05 | 0.17  | -0.22 to 0.56 | .39 | 0.24  | 1122.75 | 1173.01 |
|                                                     |     | Exemestane | 0.31  | 0.02 to 0.60   | 0.22  | -0.08 to 0.53  | 0.12  | -0.23 to 0.47  |       |               |     |       |       |               |     |       |         |         |
| Working memory <sup>i</sup>                         | .77 | Sequential | -0.51 | -0.71 to -0.31 | -0.31 | -0.53 to -0.09 | -0.69 | -1.02 to -0.35 | 0.09  | -0.21 to 0.39 | .56 | 0.08  | -0.03 | -0.50 to 0.45 | .91 | -0.02 | 875.68  | 925.94  |
|                                                     |     | Exemestane | -0.39 | -0.57 to -0.21 | -0.28 | -0.47 to -0.09 | -0.54 | -0.80 to -0.27 |       |               |     |       |       |               |     |       |         |         |

Abbreviations: T0, baseline; T1; 1 year follow-up; T2, 5 year follow-up; CI, confidence interval; ES, effect size; RAVLT, Rey Auditory Verbal Learning Test; IR, immediate recall; DR, delayed recall; VAT, Visual Association Test; WMS, Wechsler Memory Scale; AIC, Akaike information criteria; BIC, Bayesian information criteria.

<sup>a</sup> Effect sizes: .20 small effect, .50 moderate effect, .80 large effect.

<sup>b</sup> Adjusted for age, IQ, HSCL, FACT-ES.

<sup>c</sup> Adjusted for age, IQ, HSCL.

<sup>d</sup> Adjusted for age, FACT-ES.

<sup>e</sup> Adjusted for age, IQ, FACT-ES.

<sup>f</sup> Adjusted for age, HSCL.

<sup>g</sup> Adjusted for age, IQ.

<sup>h</sup> Adjusted for age.

<sup>i</sup> Adjusted for IQ.

## **Supplemental Figure Legend**

### **Supplementary Figure 1. Flow-chart inclusion per-protocol analyses**

Abbreviations: ET, endocrine therapy; T1, 1 year follow-up assessment; T2, 5 year follow-up assessment.

### **Supplementary Figure 2. Summary of results that differed before and after correction.**

Abbreviations: ITT, Intention-to-treat analyses; PP, Per-protocol analyses; ST, short-term; LT, long-term; Seq, Sequential group; Exe, Exemestane group; RAVLT, Rey Auditory Verbal Learning Test; IR, Immediate recall; DR, Delayed recall; TMT, Trail Making Test; ndom, non-dominant hand; dom, dominant hand.

NOTE. Blue is effect that arose after correction. Yellow is effect that disappeared after correction. Green remained the same. All other domains, and all other tests have been omitted from this table, as results were identical before and after correction.

### **Supplementary Figure 3. Adjusted standardized change over time between patients and controls for each cognitive domain.**

Mean z-scores are depicted per cognitive domain.

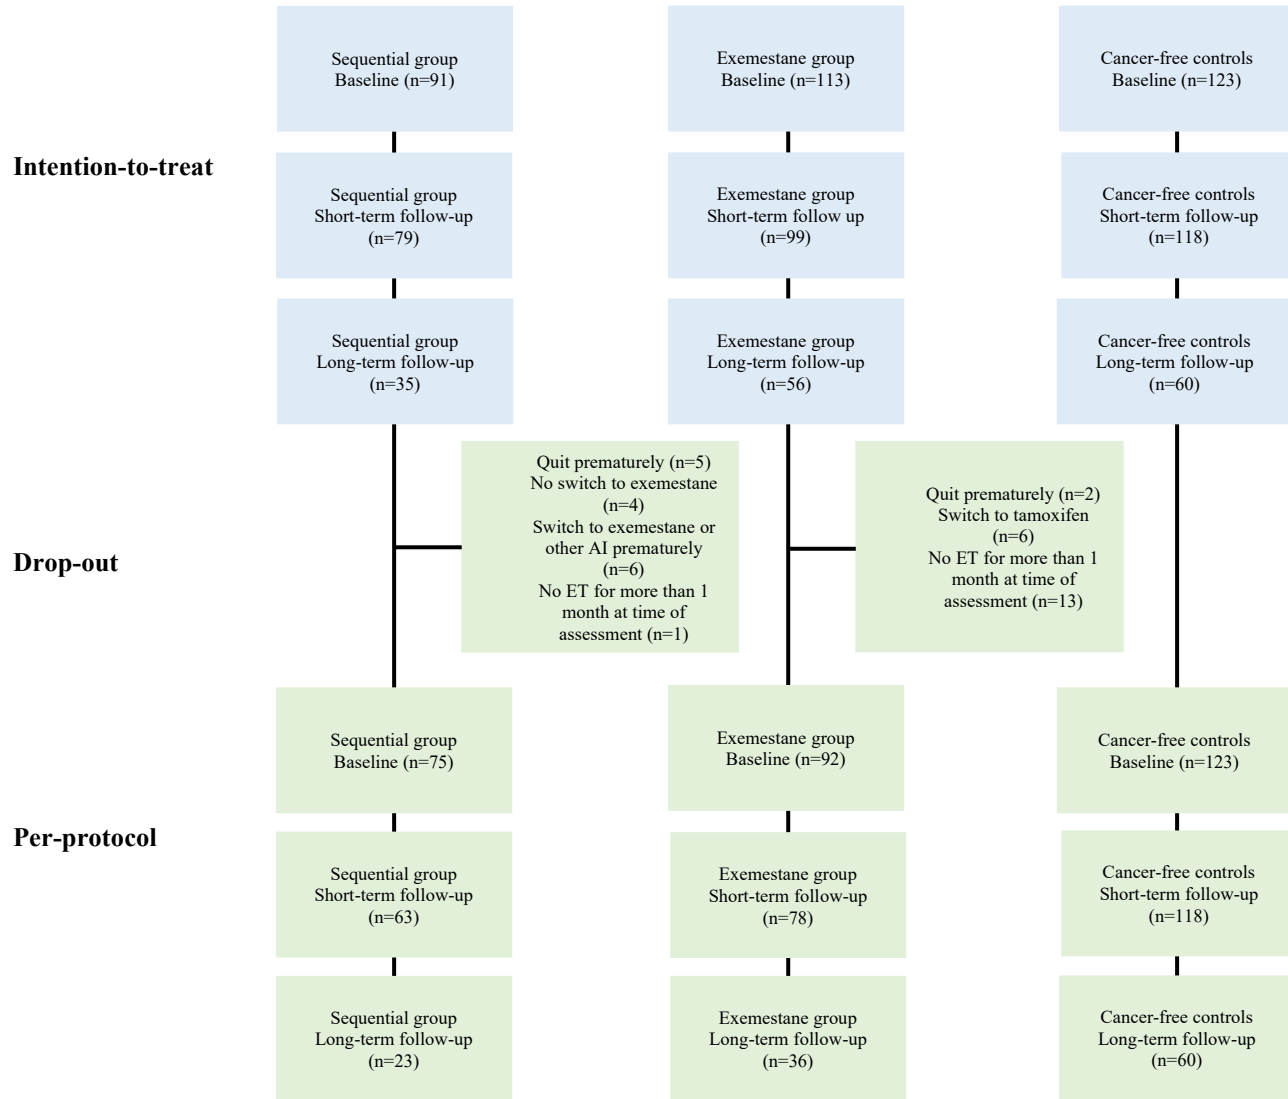



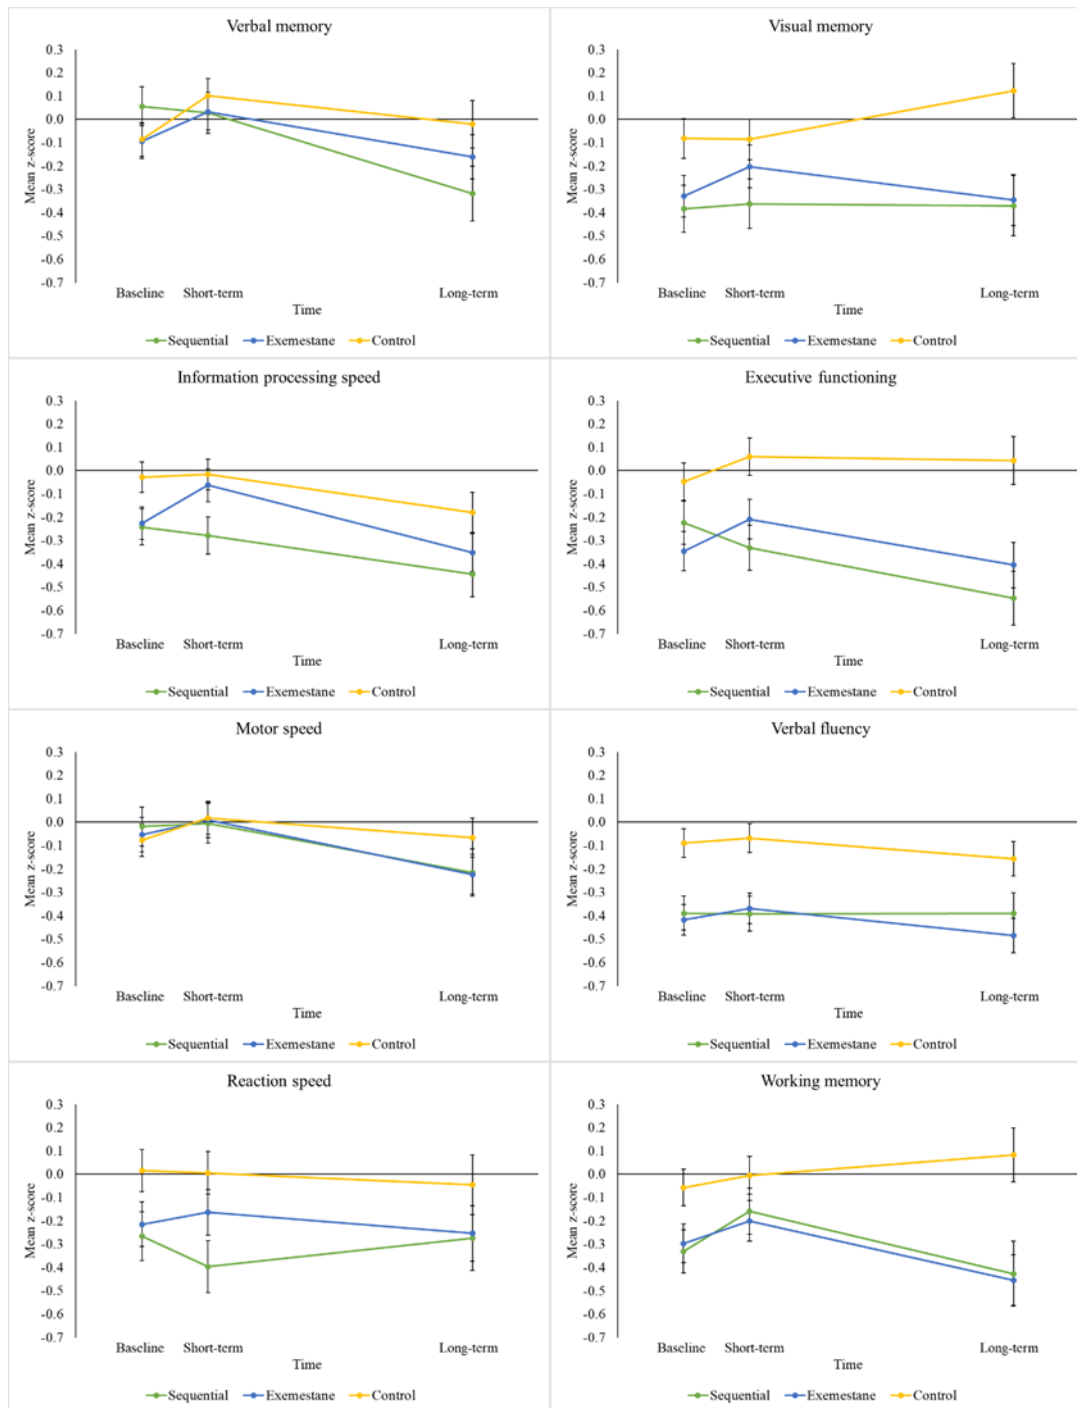

Supplement: pkad022_supplementary_data.pdf [file pkad022_supplementary_data.pdf]
